# Supplementary material
Source: PubMed Central journal article supplement (PMC3993190)
Supplement: AEM.00003-14_zam999105279so1.pdf [file AEM.00003-14_zam999105279so1.pdf]

## Supplementary Information

**Figure S1** The Shannon and Simpson indices were used to estimate diversity (i.e., a combined assessment of the number of 97% similar bacterial taxa and their abundance) of infancy fecal microbiota between infants with and without food allergy (Data shown as mean with SEM).

**Figure S2** Rarefaction curves were used to estimate richness (in this case the number of taxa at a 97% similarity level) of infancy fecal microbiota between infants with and without food allergy. The vertical axis shows the number of OTUs that would be expected to be found after sampling the number of tags or sequences shown on the horizontal axis (A). Rank abundance curve of bacterial OTUs derived from two groups (B).

**Figure S3** Rarefaction analysis of pyrosequencing tags in infancy fecal microbiota from infants with food allergy (n=34) and healthy controls (n=45).

**Figure S4** Differentiation in bacterial communities from all infants (interindividual variations). Community differentiation was measured by using the unweighted UniFrac algorithm; the scale bar indicated the distance between clusters in UniFrac units. Red bars showed the infants with IgE-mediated food allergy, while green bars showed the infants with non-IgE-mediated food allergy.

**Figure S5** 3D PCoA plots of individual fecal microbiota in infants with IgE-mediated food allergy infants (n=17), non-IgE-mediated food allergy infants (n=17) and healthy controls (n=45) obtained by Mothur program and Sigmaplot. Each symbol represents a sample. Infancy fecal microbiota from infants with food allergy and healthy controls, IgE-mediated and non-IgE-mediated almost group together.

**Figure S6** A Venn diagram illustrating overlap of OTUs in fecal microbiota between infants with and without food allergy.

**Figure S7** Percent relative abundance for the genus *Clostridium sensu stricto* is depicted across all food allergy samples, demonstrating an IgE-mediated food allergy enrichment in

most individuals.

**Table S1** List of the 79 10-bp barcodes used to tag each PCR product analyzed as part of the study.

**Table S2** Comparison of phylotypes coverage and diversity estimation of the 16S rRNA gene libraries for individuals at 97% similarity from the pyrosequencing analysis.

**Table S3** Differences in bacterial abundances between infants with and without food allergy in the phylum level.

**Table S4** Differences in bacterial abundances between infants with and without food allergy in the genus level.

Figure S1

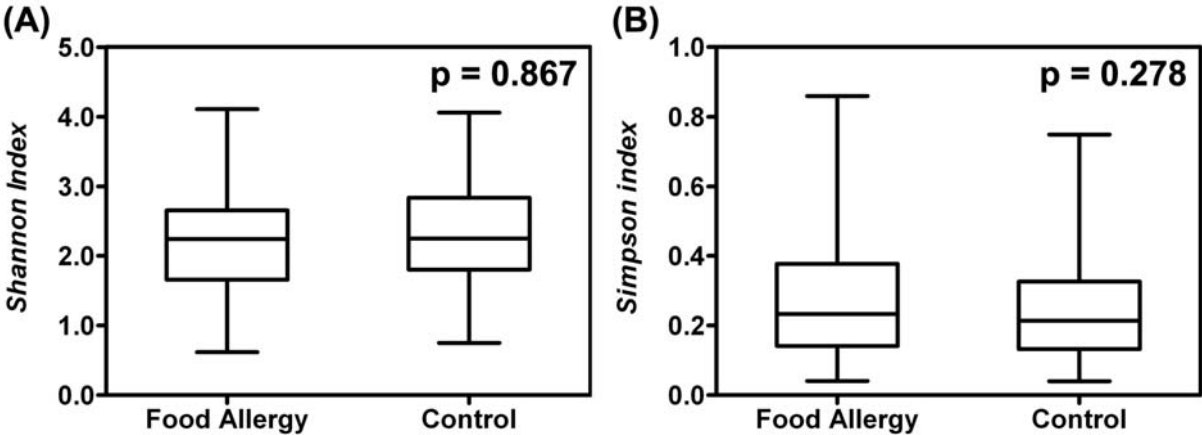

Figure S2

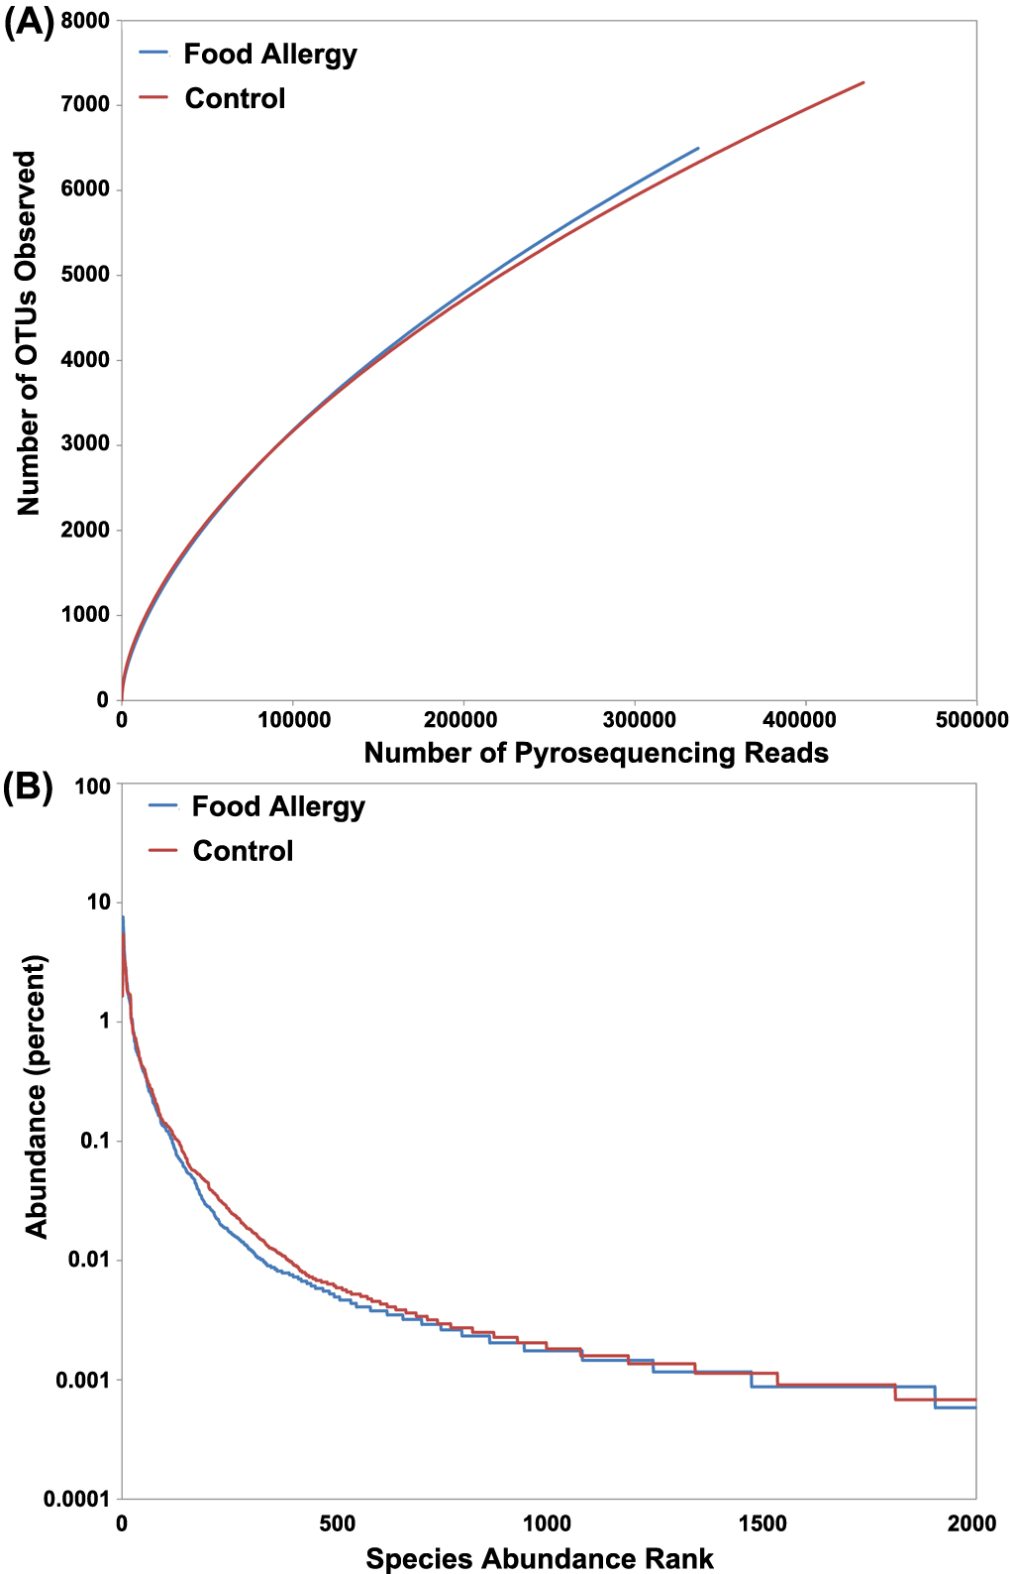

Figure S3

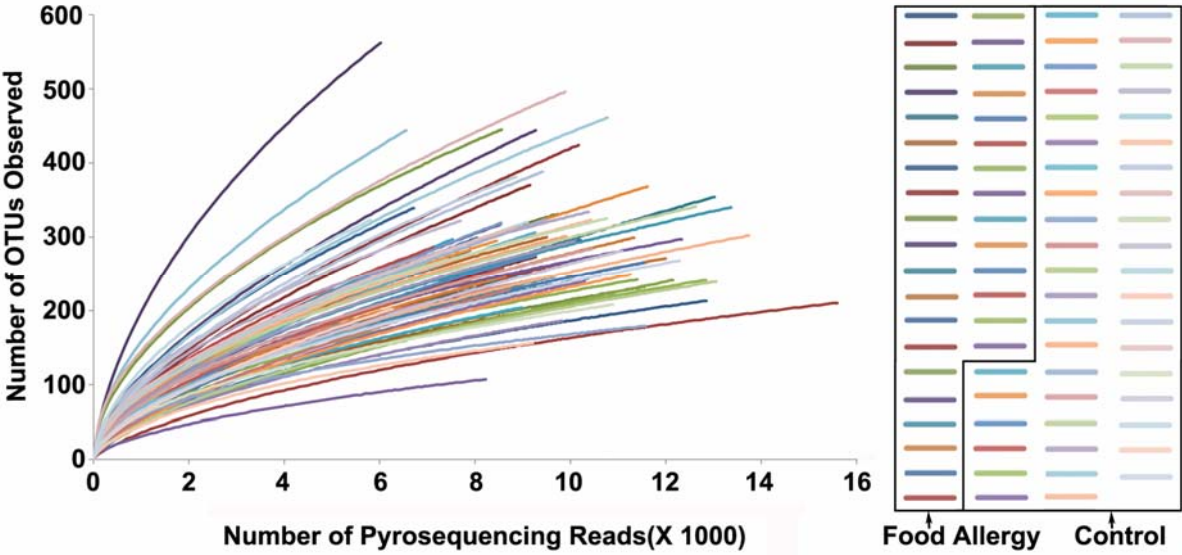

Figure S4

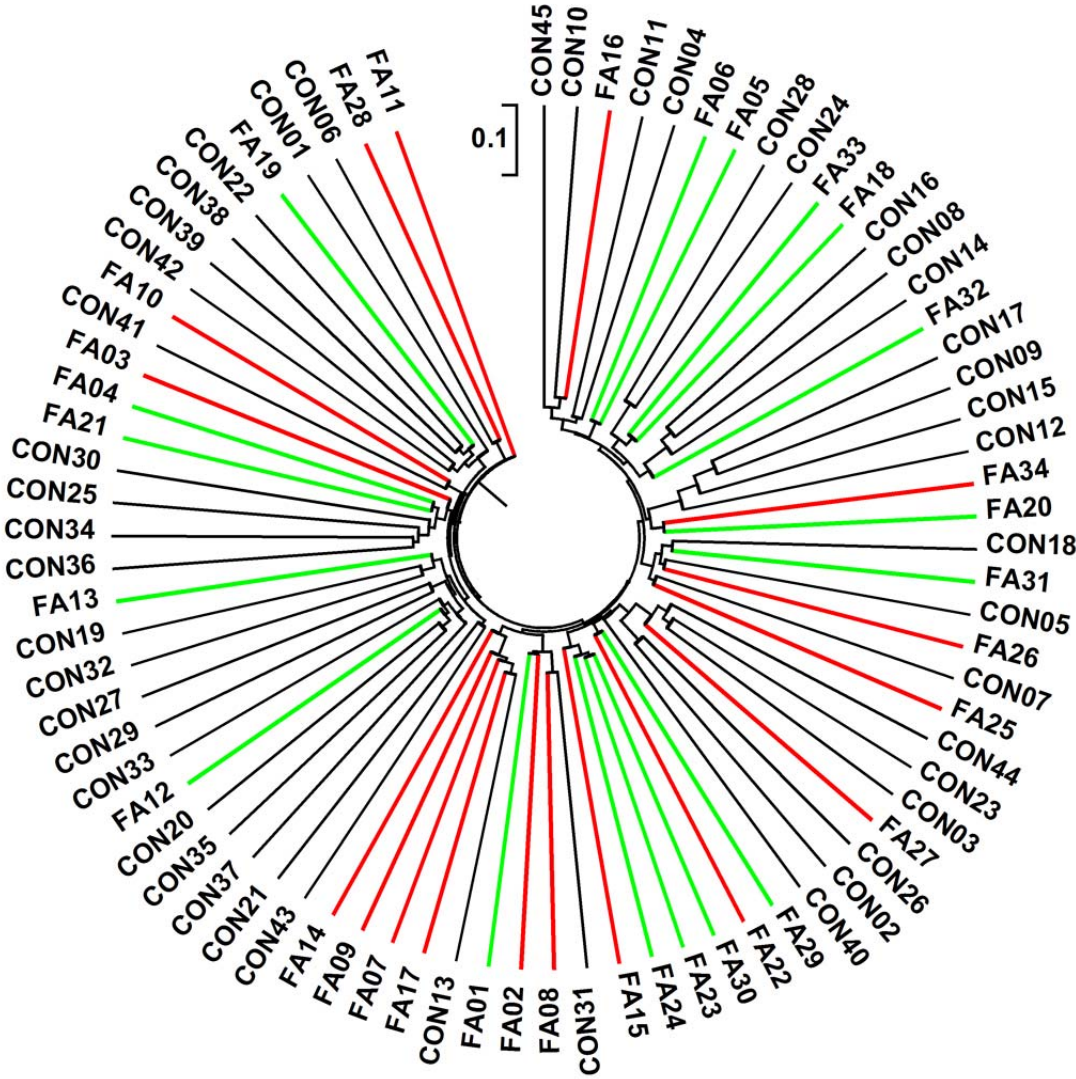

Figure S5

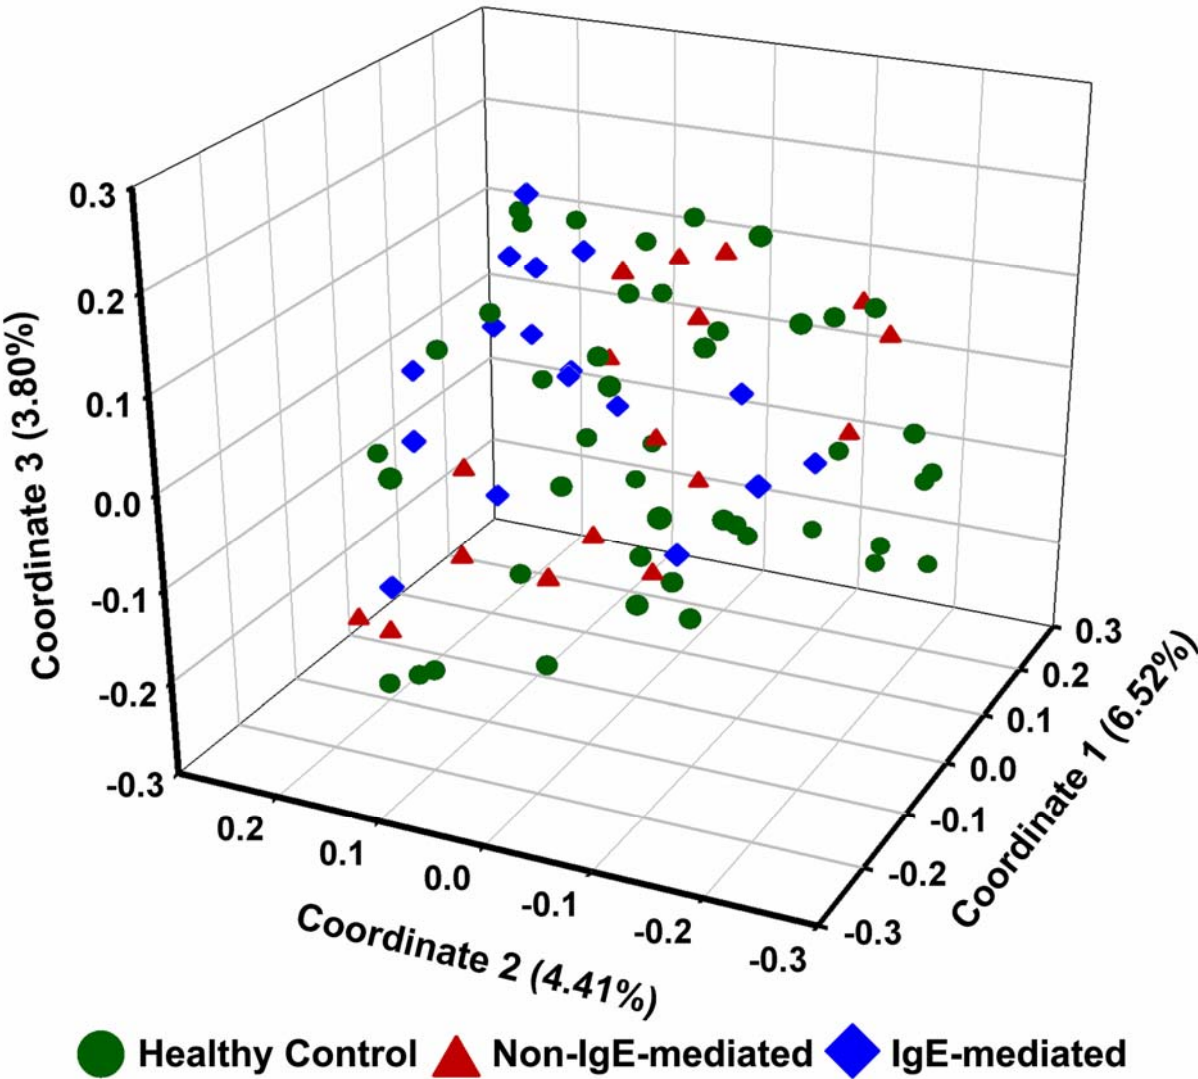

**Figure S6**

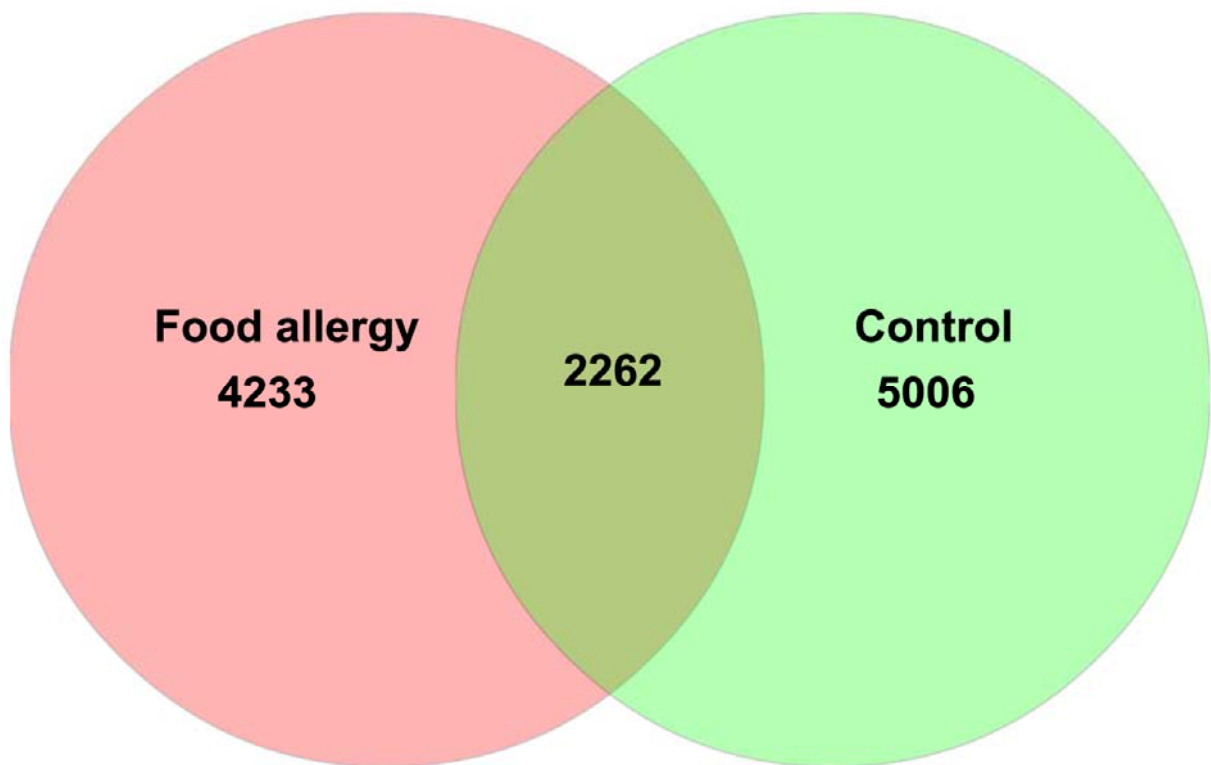



Figure S7

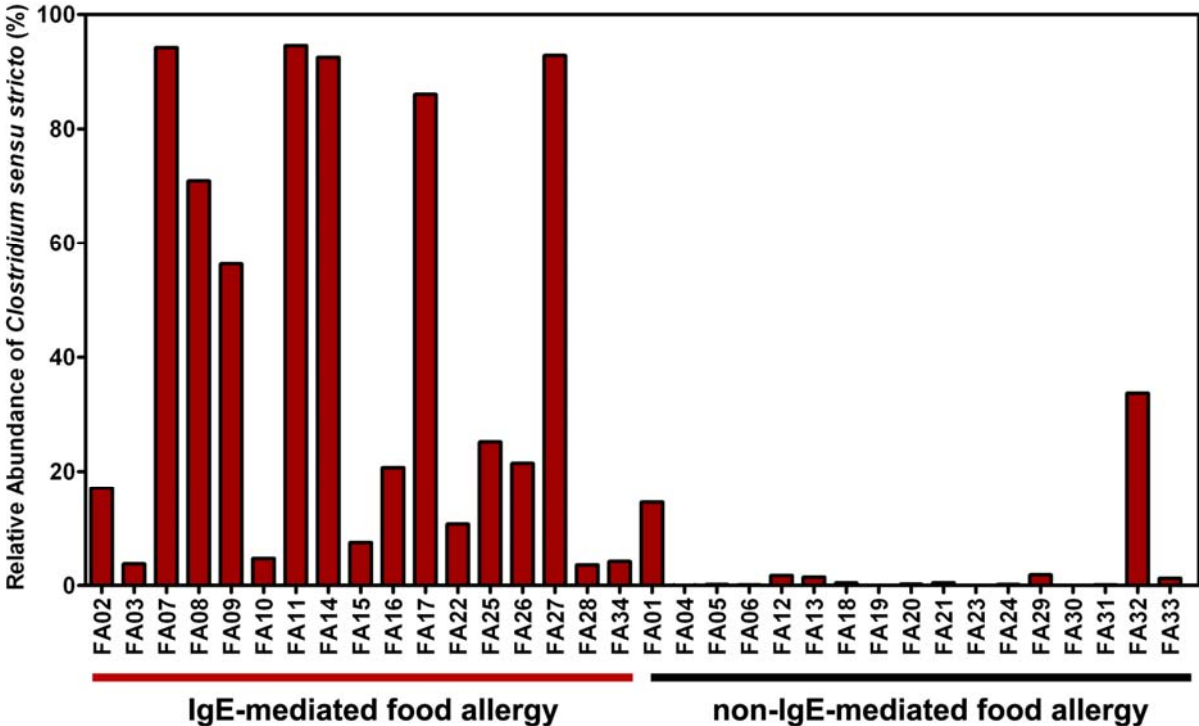

**Table S1** List of the 79 10-bp barcodes used to tag each PCR product analyzed as part of the study

| <b>Sample ID</b> | <b>Barcode</b> | <b>Sample ID</b> | <b>Barcode</b> |
|------------------|----------------|------------------|----------------|
| FA01             | CTCTACAGCG     | CON07            | ATCTGAGACG     |
| FA02             | CTGTTCGTGCG    | CON08            | ATGCTACGTC     |
| FA03             | CTGTGACGTG     | CON09            | ATGTGACTAC     |
| FA04             | GACGCTGTGCG    | CON10            | CACGAGACAG     |
| FA05             | GACGTATGAC     | CON11            | CACGCGAGTC     |
| FA06             | GACTAGCTAG     | CON12            | ACTCGCGTGC     |
| FA07             | GAGACGTCCG     | CON13            | CACGCTACGA     |
| FA08             | GAGAGAGACG     | CON14            | AGACTCGACG     |
| FA09             | GCGTAGACTA     | CON15            | CACGTGTATA     |
| FA10             | GCTCTCTACG     | CON16            | CACTACGATG     |
| FA11             | GTACACTGTA     | CON17            | CACTATACTC     |
| FA12             | GTACGCGACA     | CON18            | CAGCGTACTG     |
| FA13             | GTACTATAGA     | CON19            | CAGTCTCTAG     |
| FA14             | GTACTGAGTC     | CON20            | CATAGTCGCG     |
| FA15             | GTAGCTAGCG     | CON21            | CGAGACACTA     |
| FA16             | GTAGTCACTG     | CON22            | CGAGAGTGTG     |
| FA17             | GTAGTGTCAC     | CON23            | CGAGTCATCG     |
| FA18             | GTATACATAG     | CON24            | CGATCGTATA     |
| FA19             | GTCATCGTCG     | CON25            | CGCAGTACGC     |
| FA20             | GTCGACACGC     | CON26            | CGCGATCGTA     |
| FA21             | GTCGAGTGAG     | CON27            | CGCGCTATAC     |
| FA22             | GTCTACTATC     | CON28            | AGTACGAGAG     |
| FA23             | GTGTCTAGAC     | CON29            | CGTACAGATA     |
| FA24             | GTGTGTATCG     | CON30            | CGTAGCTCTC     |
| FA25             | ACACGACGAC     | CON31            | CGTATAGTGC     |
| FA26             | ACACGTAGTA     | CON32            | CGTCAGCGAC     |
| FA27             | ACACTACTCG     | CON33            | CGTCGCAGTG     |
| FA28             | ACGACACGTA     | CON34            | CGTCTCACGA     |
| FA29             | ACGAGTAGAC     | CON35            | CGTGA CT CAG   |
| FA30             | ACGCGTCTAG     | CON36            | CTACACGCTC     |
| FA31             | ACGTACACAC     | CON37            | CTACGATATG     |
| FA32             | ACGTACTGTG     | CON38            | CTAGACAGAC     |
| FA33             | ACGTAGATCG     | CON39            | CTAGTACTCA     |
| FA34             | ACTACGTCTC     | CON40            | CTATATGTGCG    |
| CON01            | ATAGAGCTAG     | CON41            | CTATCGACAC     |
| CON02            | ATATAGAGTA     | CON42            | CTATGTAGAG     |
| CON03            | ATCGCTCACG     | CON43            | CTCACGTACA     |
| CON04            | ATCGTCAGTC     | CON44            | CTCGAGTCTC     |
| CON05            | ACTATACGAG     | CON45            | CTCGTCGAGA     |
| CON06            | ATCTCTCGTA     |                  |                |

**Table S2** Comparison of phylotypes coverage and diversity estimation of the 16S rRNA gene libraries for individuals at 97% similarity from the pyrosequencing analysis

| <b>Sample</b> | <b>Reads</b> | <b>OTUs</b> | <b>Good's</b> | <b>ACE</b> | <b>Chao 1</b> | <b>Shannon</b> | <b>Simpson</b> |
|---------------|--------------|-------------|---------------|------------|---------------|----------------|----------------|
| FA01          | 7894         | 282         | 97.75%        | 1249       | 708           | 2.4839         | 0.1882         |
| FA02          | 9271         | 273         | 98.23%        | 1115       | 564           | 2.1561         | 0.2956         |
| FA03          | 9734         | 331         | 98.04%        | 1186       | 701           | 2.7608         | 0.1332         |
| FA04          | 6023         | 562         | 94.95%        | 1452       | 1193          | 4.1087         | 0.0479         |
| FA05          | 9172         | 252         | 98.22%        | 1098       | 640           | 2.4762         | 0.1392         |
| FA06          | 9546         | 204         | 98.84%        | 593        | 415           | 2.4291         | 0.1876         |
| FA07          | 12851        | 213         | 99.12%        | 557        | 405           | 0.7498         | 0.7998         |
| FA08          | 9153         | 370         | 97.40%        | 1957       | 1075          | 2.3229         | 0.3215         |
| FA09          | 9029         | 254         | 98.14%        | 1295       | 692           | 2.1876         | 0.1900         |
| FA10          | 9272         | 444         | 96.95%        | 2070       | 1258          | 2.9092         | 0.1468         |
| FA11          | 13021        | 354         | 98.23%        | 1408       | 828           | 0.6154         | 0.8596         |
| FA12          | 9504         | 300         | 98.32%        | 982        | 565           | 2.8613         | 0.1202         |
| FA13          | 6716         | 339         | 97.04%        | 1238       | 777           | 3.3446         | 0.0844         |
| FA14          | 10172        | 424         | 97.25%        | 2493       | 1205          | 2.4862         | 0.2272         |
| FA15          | 11550        | 232         | 98.92%        | 740        | 467           | 1.6382         | 0.4904         |
| FA16          | 8513         | 232         | 98.44%        | 824        | 598           | 1.5972         | 0.4395         |
| FA17          | 10612        | 247         | 98.82%        | 553        | 468           | 1.6612         | 0.4522         |
| FA18          | 11996        | 271         | 98.80%        | 722        | 495           | 1.9684         | 0.3481         |
| FA19          | 10214        | 296         | 98.43%        | 745        | 573           | 1.8843         | 0.3614         |
| FA20          | 15596        | 210         | 99.28%        | 557        | 364           | 0.9454         | 0.6054         |
| FA21          | 8559         | 445         | 97.29%        | 1146       | 864           | 3.9579         | 0.0409         |
| FA22          | 8530         | 317         | 97.66%        | 1358       | 841           | 2.7586         | 0.1415         |
| FA23          | 9653         | 246         | 98.54%        | 781        | 586           | 1.6405         | 0.4214         |
| FA24          | 11335        | 299         | 98.48%        | 998        | 619           | 1.9241         | 0.3146         |
| FA25          | 8046         | 299         | 97.55%        | 2171       | 989           | 3.0146         | 0.0938         |
| FA26          | 9993         | 267         | 98.46%        | 810        | 554           | 2.4498         | 0.1515         |
| FA27          | 12152        | 241         | 98.68%        | 1193       | 730           | 0.8035         | 0.7808         |
| FA28          | 4031         | 113         | 98.61%        | 268        | 204           | 1.6401         | 0.3409         |
| FA29          | 13369        | 340         | 98.59%        | 1121       | 749           | 2.6232         | 0.1809         |
| FA30          | 8630         | 246         | 98.34%        | 777        | 545           | 2.0980         | 0.2381         |
| FA31          | 8222         | 183         | 98.71%        | 638        | 382           | 2.4120         | 0.1399         |
| FA32          | 10830        | 277         | 98.41%        | 879        | 697           | 2.2933         | 0.1752         |
| FA33          | 11403        | 242         | 98.91%        | 610        | 480           | 1.9481         | 0.3215         |
| FA34          | 12334        | 297         | 98.79%        | 698        | 612           | 2.0151         | 0.3361         |
| CON01         | 7530         | 297         | 97.41%        | 1594       | 747           | 2.6497         | 0.1386         |
| CON02         | 11615        | 368         | 98.02%        | 1622       | 865           | 2.8040         | 0.1157         |
| CON03         | 11537        | 265         | 98.74%        | 712        | 547           | 1.7204         | 0.3325         |
| CON04         | 7129         | 286         | 97.63%        | 1208       | 650           | 2.9835         | 0.1191         |
| CON05         | 12840        | 241         | 98.95%        | 448        | 462           | 2.1425         | 0.1852         |
| CON06         | 8227         | 107         | 99.30%        | 300        | 194           | 0.7495         | 0.7490         |
| CON07         | 8976         | 204         | 98.71%        | 677        | 451           | 1.3170         | 0.5715         |

|       |       |     |        |      |      |        |        |
|-------|-------|-----|--------|------|------|--------|--------|
| CON08 | 8454  | 295 | 97.92% | 1053 | 630  | 1.8024 | 0.3287 |
| CON09 | 9270  | 275 | 98.23% | 750  | 572  | 1.9956 | 0.2519 |
| CON10 | 8584  | 257 | 98.16% | 1094 | 657  | 2.2970 | 0.1974 |
| CON11 | 6934  | 265 | 97.74% | 1053 | 625  | 2.7636 | 0.1322 |
| CON12 | 10300 | 240 | 98.64% | 702  | 439  | 2.2481 | 0.1616 |
| CON13 | 9264  | 306 | 97.94% | 1126 | 718  | 2.1350 | 0.2386 |
| CON14 | 11258 | 249 | 98.66% | 860  | 539  | 1.9881 | 0.2215 |
| CON15 | 8549  | 319 | 97.56% | 1248 | 837  | 2.5908 | 0.1439 |
| CON16 | 8712  | 228 | 98.30% | 1154 | 539  | 2.0375 | 0.2325 |
| CON17 | 6978  | 265 | 97.52% | 1051 | 703  | 2.0383 | 0.2864 |
| CON18 | 9823  | 186 | 98.95% | 519  | 355  | 1.5704 | 0.4401 |
| CON19 | 8726  | 220 | 98.71% | 547  | 438  | 2.2071 | 0.2334 |
| CON20 | 9912  | 301 | 98.38% | 835  | 601  | 2.8027 | 0.1323 |
| CON21 | 11578 | 179 | 99.33% | 374  | 296  | 1.5564 | 0.4987 |
| CON22 | 9648  | 247 | 98.75% | 623  | 449  | 2.2457 | 0.2929 |
| CON23 | 13056 | 239 | 98.98% | 702  | 476  | 1.0206 | 0.6678 |
| CON24 | 10076 | 294 | 98.42% | 861  | 536  | 2.8797 | 0.1041 |
| CON25 | 6558  | 444 | 96.19% | 1495 | 1079 | 4.0590 | 0.0400 |
| CON26 | 13741 | 302 | 98.76% | 908  | 730  | 1.7628 | 0.3232 |
| CON27 | 9464  | 323 | 97.87% | 1696 | 903  | 3.2146 | 0.0835 |
| CON28 | 10456 | 284 | 98.45% | 938  | 767  | 2.6186 | 0.1498 |
| CON29 | 12631 | 341 | 98.50% | 1276 | 779  | 2.8830 | 0.1533 |
| CON30 | 10380 | 334 | 98.44% | 763  | 618  | 2.6092 | 0.1857 |
| CON31 | 10778 | 461 | 97.49% | 1622 | 1007 | 2.6566 | 0.2352 |
| CON32 | 10431 | 323 | 98.26% | 1080 | 720  | 2.2482 | 0.2882 |
| CON33 | 9416  | 388 | 97.49% | 1478 | 954  | 2.8757 | 0.1568 |
| CON34 | 9892  | 496 | 97.22% | 1887 | 1050 | 3.9979 | 0.0534 |
| CON35 | 10762 | 325 | 98.47% | 814  | 633  | 2.9035 | 0.1218 |
| CON36 | 7697  | 322 | 97.77% | 976  | 656  | 3.1291 | 0.1263 |
| CON37 | 9100  | 320 | 97.79% | 1757 | 878  | 3.1819 | 0.0815 |
| CON38 | 9211  | 156 | 99.16% | 351  | 283  | 1.2213 | 0.5708 |
| CON39 | 8858  | 381 | 97.53% | 1255 | 772  | 2.6568 | 0.1652 |
| CON40 | 8866  | 314 | 97.89% | 1486 | 760  | 3.1390 | 0.0989 |
| CON41 | 10888 | 208 | 99.03% | 547  | 440  | 1.6200 | 0.4921 |
| CON42 | 11085 | 281 | 98.40% | 1376 | 661  | 1.4205 | 0.5577 |
| CON43 | 5808  | 323 | 96.87% | 1068 | 756  | 2.7679 | 0.2132 |
| CON44 | 6268  | 202 | 97.91% | 917  | 506  | 2.0833 | 0.2324 |
| CON45 | 12288 | 268 | 98.81% | 821  | 539  | 1.7970 | 0.3734 |

Abbreviations: FA, food allergy; CON, healthy control.

**Table S3** Differences in bacterial abundances between infants with and without food allergy in the phylum level

| Phylum         | Healthy Control |                 | Food Allergy |         | Metastats P value | Metastats Q value <sup>2</sup> |
|----------------|-----------------|-----------------|--------------|---------|-------------------|--------------------------------|
|                | Mean            | SE <sup>1</sup> | Mean         | SE      |                   |                                |
| Firmicutes     | 65.1942%        | 0.0723%         | 70.9426%     | 0.0782% | 0.0000E+00        | 0.0000E+00                     |
| Bacteroidetes  | 18.5105%        | 0.0590%         | 16.0376%     | 0.0632% | 3.5967E-177       | 3.6137E-176                    |
| Proteobacteria | 13.6629%        | 0.0522%         | 11.7269%     | 0.0554% | 2.7742E-140       | 2.0905E-139                    |
| Actinobacteria | 1.2238%         | 0.0167%         | 1.1258%      | 0.0182% | 8.0713E-05        | 3.4755E-04                     |

<sup>1</sup> SE: standard error.

<sup>2</sup> A comparison of fecal microbiota between infants with and without food allergy was performed using Metastats. Q value indicates that the false discovery rate and that a lower value is generally preferred to avoid a false positive result.

**Table S4** Differences in bacterial abundances between infants with and without food allergy in the genus level

| Phylum         | Genus                         | Healthy Control |         | Food Allergy |         | Metastats P value | Metastats Q value |
|----------------|-------------------------------|-----------------|---------|--------------|---------|-------------------|-------------------|
|                |                               | Mean            | SE      | Mean         | SE      |                   |                   |
| Firmicutes     | Clostridium sensu stricto     | 10.6847%        | 0.0469% | 24.4033%     | 0.0740% | 0.0000E+00        | 0.0000E+00        |
| Bacteroidetes  | Bacteroides                   | 16.8892%        | 0.0569% | 14.0645%     | 0.0599% | 4.2370E-251       | 1.0356E-249       |
| Firmicutes     | Streptococcus                 | 12.3256%        | 0.0499% | 8.5618%      | 0.0482% | 0.0000E+00        | 0.0000E+00        |
| Firmicutes     | Enterococcus                  | 2.3616%         | 0.0231% | 8.2707%      | 0.0475% | 0.0000E+00        | 0.0000E+00        |
| Firmicutes     | Veillonella                   | 13.5559%        | 0.0520% | 7.5845%      | 0.0456% | 0.0000E+00        | 0.0000E+00        |
| Proteobacteria | Escherichia/Shigella          | 6.1238%         | 0.0364% | 7.3779%      | 0.0450% | 4.2412E-106       | 7.5065E-105       |
| Proteobacteria | Klebsiella                    | 3.6074%         | 0.0283% | 3.1108%      | 0.0299% | 7.1452E-33        | 8.1497E-32        |
| Firmicutes     | Lactobacillus                 | 1.4427%         | 0.0181% | 3.0401%      | 0.0296% | 0.0000E+00        | 0.0000E+00        |
| Firmicutes     | Staphylococcus                | 0.4472%         | 0.0101% | 2.2658%      | 0.0256% | 0.0000E+00        | 0.0000E+00        |
| Firmicutes     | Faecalibacterium              | 1.5428%         | 0.0187% | 1.8434%      | 0.0232% | 2.1470E-24        | 2.1192E-23        |
| Firmicutes     | Clostridium XIVa              | 0.8797%         | 0.0142% | 1.7906%      | 0.0228% | 5.9084E-273       | 1.5163E-271       |
| Firmicutes     | Blautia                       | 2.3702%         | 0.0231% | 1.7137%      | 0.0224% | 4.9362E-89        | 7.9174E-88        |
| Firmicutes     | Anaerostipes                  | 0.0039%         | 0.0010% | 1.5448%      | 0.0212% | 0.0000E+00        | 0.0000E+00        |
| Bacteroidetes  | Prevotella                    | 0.8899%         | 0.0143% | 1.3923%      | 0.0202% | 9.1911E-97        | 1.5218E-95        |
| Firmicutes     | Clostridium XVIII             | 0.5277%         | 0.0110% | 1.2935%      | 0.0195% | 1.8086E-284       | 4.8858E-283       |
| Firmicutes     | Flavonifractor                | 0.7967%         | 0.0135% | 1.0029%      | 0.0172% | 1.1204E-21        | 1.0649E-20        |
| Firmicutes     | Clostridium XI                | 1.2912%         | 0.0171% | 0.6052%      | 0.0134% | 1.4158E-199       | 3.0278E-198       |
| Firmicutes     | Lachnospiracea_incertae_sedis | 1.5624%         | 0.0188% | 0.5521%      | 0.0128% | 0.0000E+00        | 0.0000E+00        |
| Firmicutes     | Megamonas                     | 1.3119%         | 0.0173% | 0.0217%      | 0.0025% | 0.0000E+00        | 0.0000E+00        |
| Firmicutes     | Megasphaera                   | 1.2344%         | 0.0168% | 0.0157%      | 0.0022% | 0.0000E+00        | 0.0000E+00        |
